# Supplementary material for: On the nature of the photochemical reaction of polypyridyl Ru(ii) complexes leading to sunlight-to-chemical energy conversion: density functional analysis
Source: Royal Society of Chemistry journal article supplement (doi:10.1039/c3ra41195h), 2013-01-01
Supplement: c3ra41195h.pdf [file c3ra41195h.pdf]

Supplementary Information

**On the nature of the photochemical reaction of polypyridyl Ru(II) complexes leading to  
sunlight-to-chemical energy conversion: Density functional analysis**

Esra E. Kasapbasi<sup>1\*</sup> and Myung-Hwan Whangbo<sup>2\*</sup>

<sup>1</sup> Biomedical Equipment Technology Program, Istanbul Aydin University, Istanbul, Turkey

<sup>2</sup> Department of Chemistry, North Carolina State University, Raleigh, North Carolina 27695-  
8204

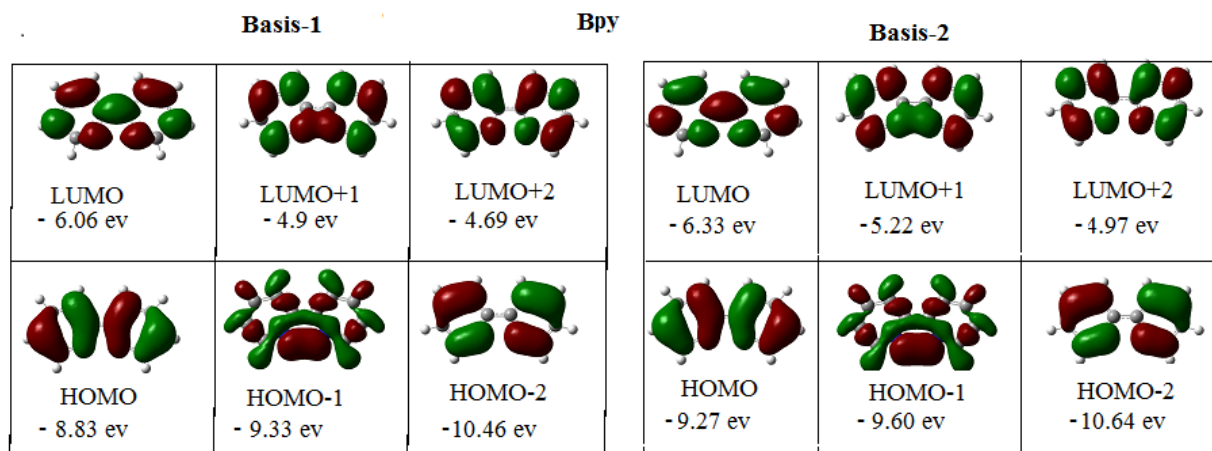

Figure S1. (a) Comparison of the MO shapes and energies of an isolated bpy molecule in acetonitrile determined from the DFT calculations with Basis-1 and Basis-2.

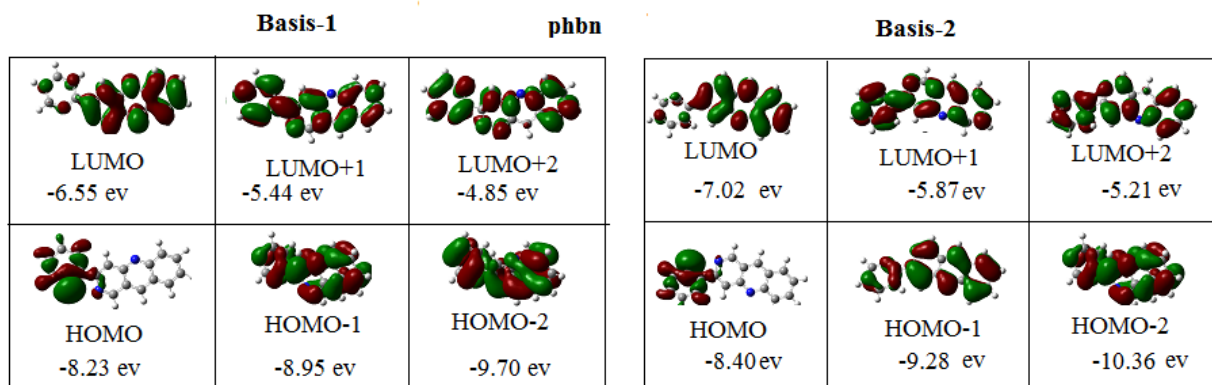

Figure S1. (b) Comparison of the MO shapes and energies of an isolated phbn<sup>-</sup> anion in acetonitrile determined from the DFT calculations with Basis-1 and Basis-2.

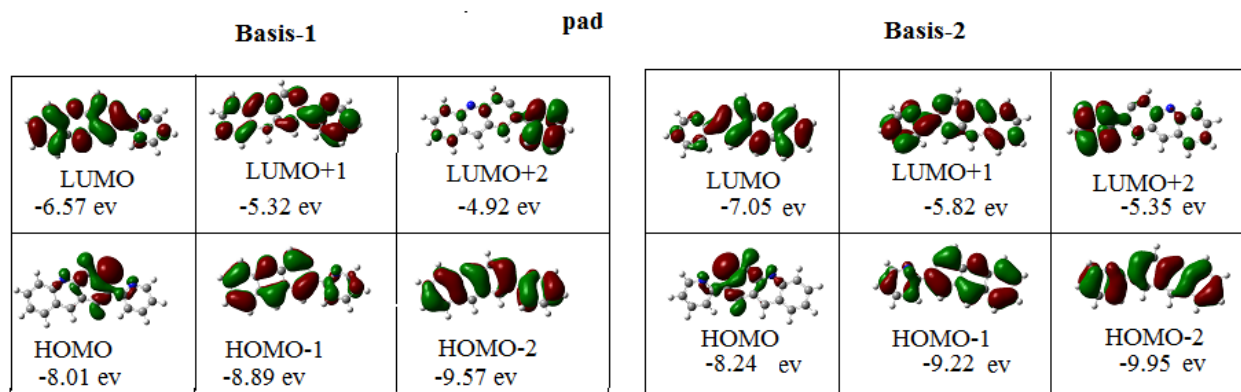

Figure S1. (c) Comparison of the MO shapes and energies of isolated  $\text{pad}^-$  anion in acetonitrile determined from the DFT calculations with Basis-1 and Basis-2

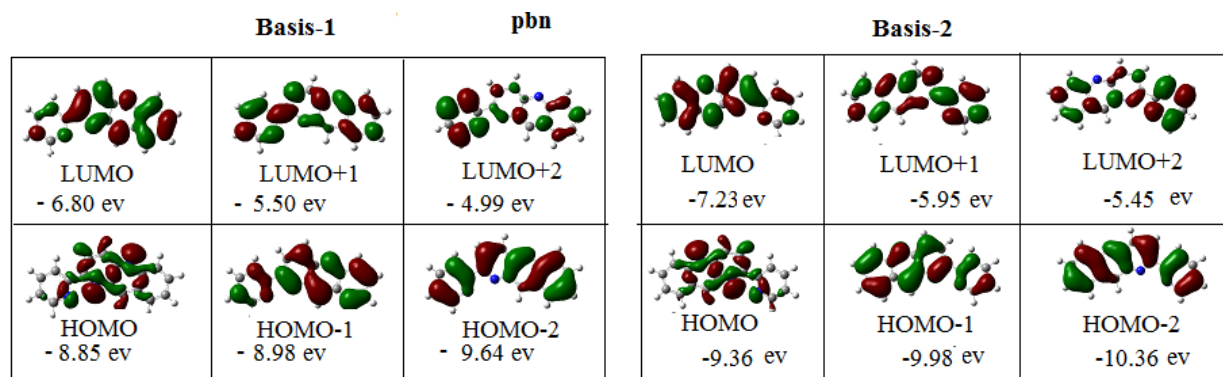

Figure S1. (d) Comparison of the MO shapes and energies of an isolated  $\text{pbn}^0$  molecule in acetonitrile determined from the DFT calculations with Basis-1 and Basis-2.

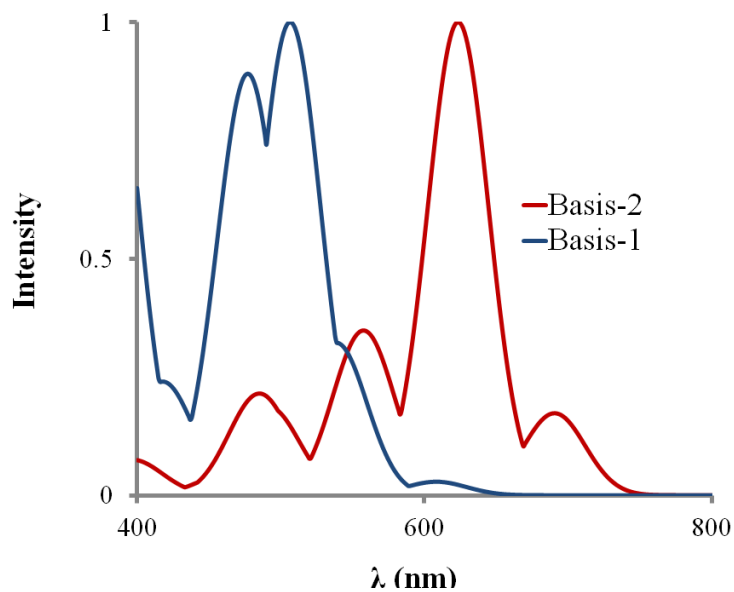

**Figure S2.** The comparison of the absorption spectra of the Ru (II) complex **2** obtained from the TD-DFT calculations with (a) Basis-1 and (b) Basis-2. The intensities of the calculated absorption peaks were scaled with respect to the strongest one in the visible region, which was assigned to have the intensity of 1.0.

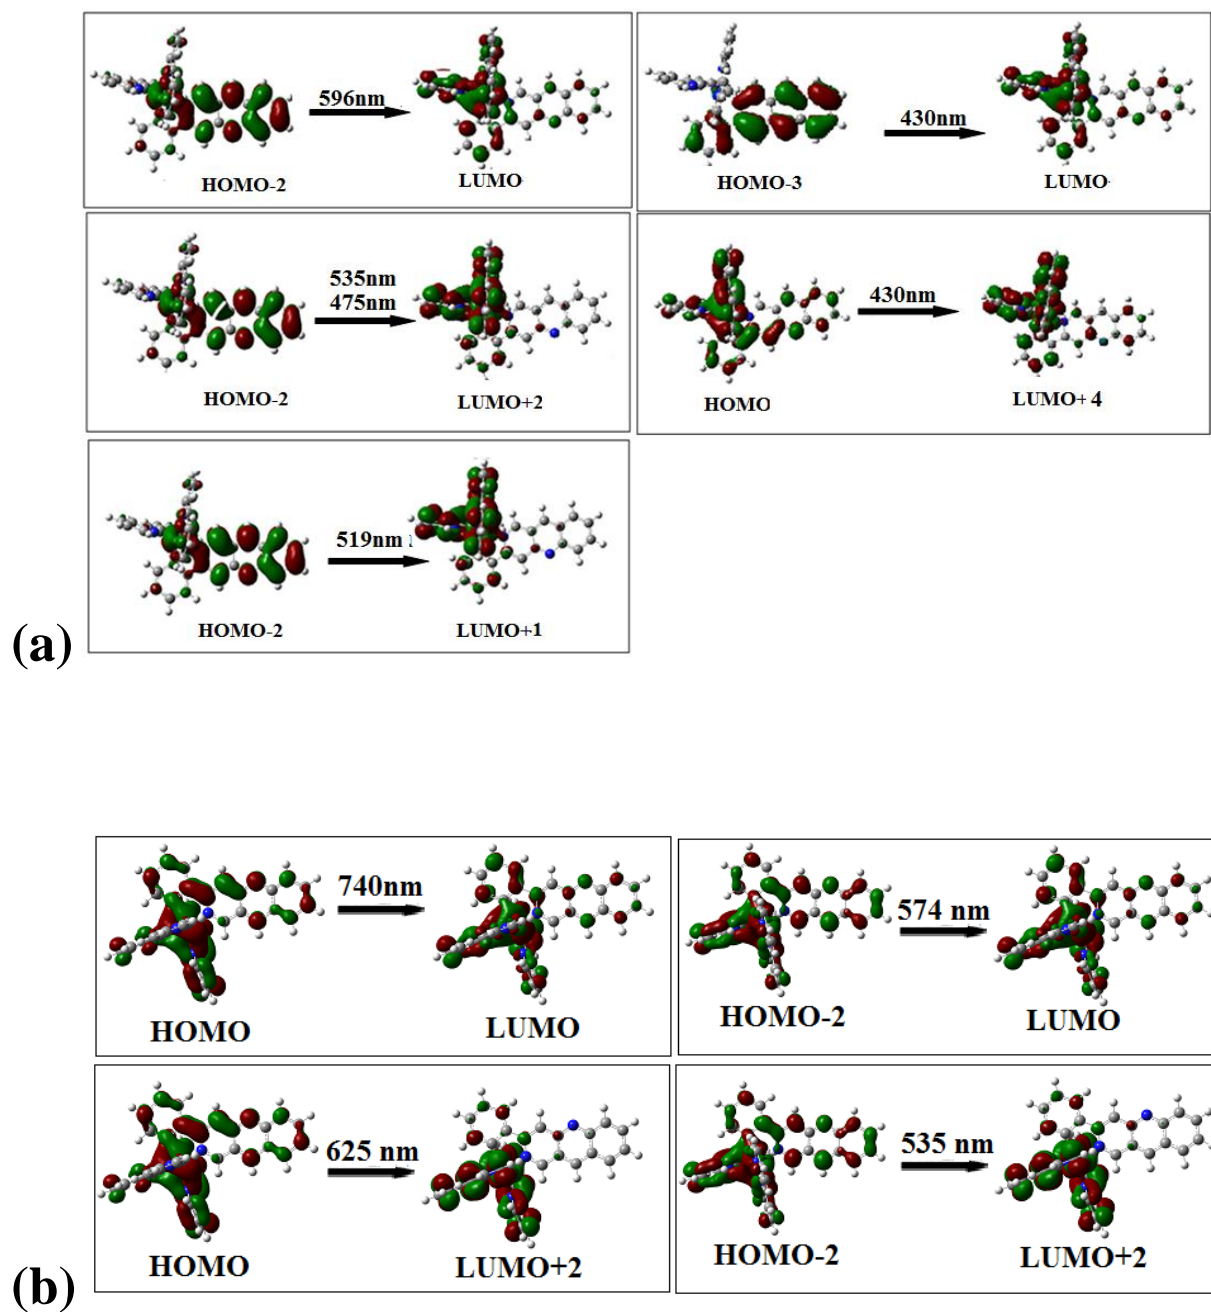

**Figure S3.** The molecular orbitals involved in the optical absorption of **1** (with **L** = **phbn**) in the visible region obtained from the TD-DFT calculations with (a) Basis-1 and (b) Basis-2.

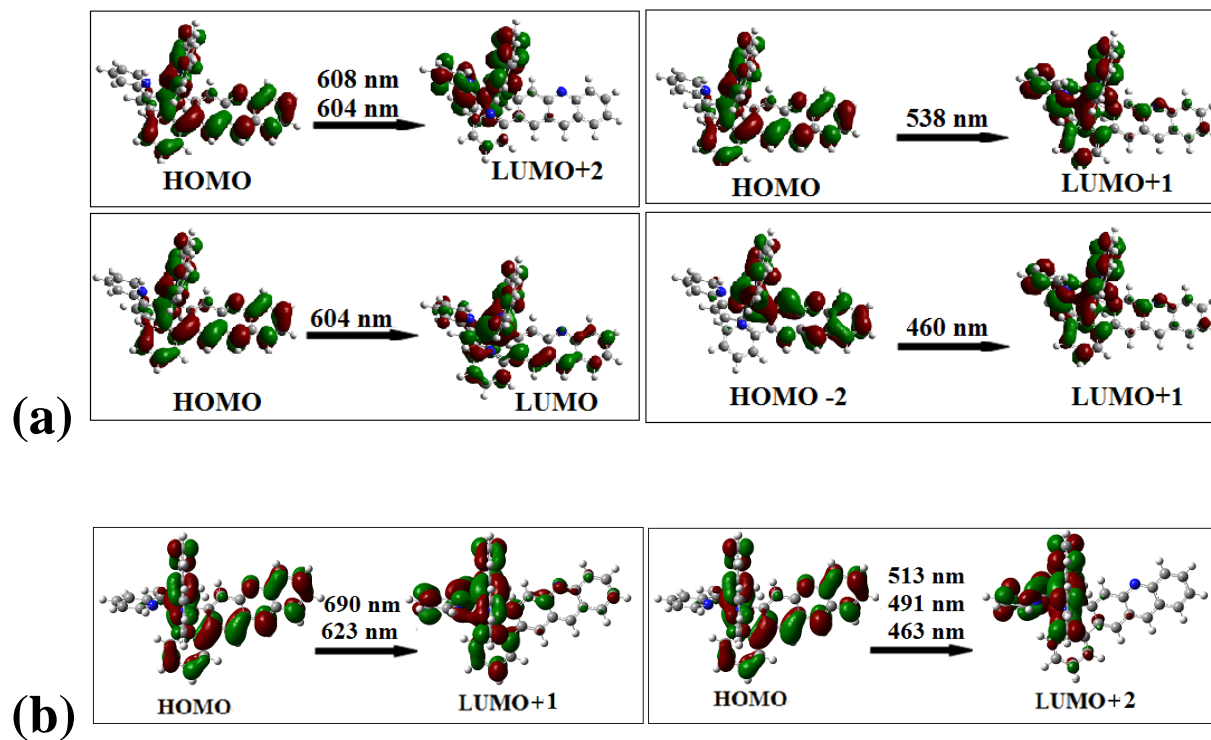

**Figure S4.** The molecular orbitals involved in the optical absorption of **2** in the visible region from the TD-DFT calculations with Basis-1 in (a), and those with Basis-2 in (b).
